# Supplementary material
Source: Research Square preprint supplement (doi:10.21203/rs.3.rs-7831805/v3)
Supplement: Supplementary file 1 [file 23d5d5a780fd975d062b32b5.xlsx]

## Sheet: NPB_NSB
	Net private benefit, data for figure 3a
	€*Mg miscanthus-1	bioenergy (BE)	biochar carbon removal (BCR)
	biomass costs	-103.111	-103.111
	process CAPEX	-21.3411	-73.0638
	process OPEX	-33.9838	-113.301
	CDR transport costs	0	-1.92858
	storage costs	0	-1.9202
	tax	-17.4122	0
	carbon removal credit revenue	0	43.2418
	biochar revenue	0	120.676
	electricity revenue	0	0
	district heat revenue	228.085	99.0457
	net private benefit	52.2367	-30.3612
	Net social benefit, data for figure 3b
	€*Mg miscanthus-1	bioenergy (BE)	biochar carbon removal (BCR)
	biomass costs	-103.111	-103.111
	process CAPEX	-21.3411	-73.0638
	process OPEX	-33.9838	-113.301
	CDR transport costs	0	-1.92858
	storage costs	0	-1.9202
	tax	-17.4122	0
	damage costs: global warming potential	194.564	85.0373
	damage costs: other impact categories	31.1646	1.80455
	carbon removal credit revenue	0	43.2418
	biochar revenue	0	120.676
	electricity revenue	0	0
	district heat revenue	228.085	99.0457
	net social benefit	277.966	56.4807

## Sheet: LCA_damage_costs
	LCA results for bioenergy (BE) and biochar carbon removal (BCR) per impact category, given per Mg miscanthus
	GWP					Acidification					Eutrophication: freshwater					Eutrophication: marine					Ozone depletion					Water use
	Mg CO2eq	BE	BCR			kg SO2eq	BE	BCR			kg Peq	BE	BCR			kg Neq	BE	BCR			kg CFC-11eq	BE	BCR			m3	BE	BCR
	sum positive pathway, stored, avoided emissions	-1.16961	-0.815455			sum positive pathway and avoided emissions	-5.74131	-1.85613			sum positive pathway and avoided emissions	-0.281479	0.165678			sum positive pathway and avoided emissions	0.345792	0.382725			sum positive pathway and avoided emissions	0.000651177	0.000882797			sum positive pathway and avoided resource use	-1.09581	2.15406
	positive pathway emissions	0.11256	0.244498			positive pathway emissions	1.01952	0.812622			positive pathway emissions	0.232218	0.368453			positive pathway emissions	0.382484	0.397208			positive pathway emissions	0.000942407	0.000997756			positive pathway resource use	0.535311	2.79792
	permanently stored emissions	0	-0.553835			avoided emissions district heat	-6.76083	-2.66875			avoided emissions district heat	-0.513697	-0.202775			avoided emissions district heat	-0.0366918	-0.0144836			avoided emissions district heat	-0.000291229	-0.000114959			avoided resource use district heat	-1.63112	-0.643865
	avoided emissions district heat	-1.28217	-0.506118
	carbon dioxide removal	0	-0.309337
	Damage cost results for bioenergy (BE) and biochar carbon removal (BCR) per impact category, given in € per Mg miscanthus
	GWP					Acidification					Eutrophication: freshwater					Eutrophication: marine					Ozone depletion					Water use
	€	BE	BCR			€	BE	BCR			€	BE	BCR			€	BE	BCR			€	BE	BCR			€	BE	BCR
	sum positive pathway, stored, avoided emissions	194.166	135.374			sum positive pathway and avoided emissions	38.6378	12.4913			sum positive pathway and avoided emissions	1.34434	-0.791272			sum positive pathway and avoided emissions	-6.29247	-6.96454			sum positive pathway and avoided emissions	-0.0241982	-0.0328054			sum positive pathway and avoided resource use	0.569537	-1.11955
	positive pathway emissions	-18.6861	-40.5891			positive pathway emissions	-6.86114	-5.46877			positive pathway emissions	-1.10907	-1.75972			positive pathway emissions	-6.96016	-7.2281			positive pathway emissions	-0.0350205	-0.0370773			positive pathway resource use	-0.278222	-1.45419
	permanently stored emissions	0	91.9421			avoided emissions district heat	45.499	17.9601			avoided emissions district heat	2.45341	0.968451			avoided emissions district heat	0.667689	0.263561			avoided emissions district heat	0.0108223	0.00427195			avoided resource use district heat	0.847759	0.334642
	avoided emissions district heat	212.852	84.0207

## Sheet: LCA_all_ReCiPe_midpoint_results
	Impact assessment method: ReCiPe 2016 v1.03, midpoint (H), sum positive pathway, stored, avoided emissions
	Impact category UUID	Impact category	bioenergy (BE)	biochar carbon removal (BCR)	unit * Mg miscanthus-1
	eecb511c-af14-4894-8fdd-b2fe6c95f0d8	Acidification: terrestrial	-5.74131	-1.85613	kg SO2-Eq
	1a536c0b-c82b-4e72-8df6-e5037c95c226	Climate change	-1169.61	-815.455	kg CO2-Eq
	5a39bcae-830a-4380-a764-62f6ea98ebf8	Ecotoxicity: freshwater	-10.3928	19.6599	kg 1,4-DCB-Eq
	03c598fa-4b8e-4784-a441-d6d9a800dd1d	Ecotoxicity: marine	-16.175	27.7449	kg 1,4-DCB-Eq
	336f3fae-324b-416d-b1be-0f7623c2933b	Ecotoxicity: terrestrial	-831.347	2581.12	kg 1,4-DCB-Eq
	db3ab420-df1b-4795-b3d1-6986a3f16f9b	Energy resources: non-renewable, fossil	-255.418	-45.1324	kg oil-Eq
	2877d4ef-a819-4392-9532-345a2155a323	Eutrophication: freshwater	-0.281479	0.165678	kg P-Eq
	3ecc1c8f-df22-47aa-ad16-6c2044239055	Eutrophication: marine	0.345792	0.382725	kg N-Eq
	bce64d8e-d059-426c-8195-c63ce0704114	Human toxicity: carcinogenic	-55.0004	42.0563	kg 1,4-DCB-Eq
	645e37b8-745d-462e-a1ba-13b2ff28b319	Human toxicity: non-carcinogenic	-590.316	1376.67	kg 1,4-DCB-Eq
	f0382ee9-6902-4eb8-9290-50dbeabf08c4	Ionising radiation	-7.20374	31.4667	kBq Co-60-Eq
	828a9253-0de8-40de-ba0a-a6c3e01bc068	Land use	452.218	612.115	m2*a crop-Eq
	d0665b81-f547-4879-b20e-f4184531dbf3	Material resources: metals/minerals	-0.0364811	4.03004	kg Cu-Eq
	a369b5b3-2244-45df-b5f0-1dd0da447a2e	Ozone depletion	0.000651177	0.000882797	kg CFC-11-Eq
	e76dba7d-66ae-4bd7-b8dd-f90678b5c763	Particulate matter formation	-1.1919	-0.322029	kg PM2.5-Eq
	7c7056fb-e934-436e-976e-ff75cdba2133	Photochemical oxidant formation: human health	-2.63553	-0.131916	kg NOx-Eq
	bbab8de1-21f1-4652-a9ea-09f1e040b2d2	Photochemical oxidant formation: terrestrial ecosystems	-2.69973	-0.121067	kg NOx-Eq
	a1cd5d2c-a125-4bb1-9898-ce2265356f4b	Water use	-1.09581	2.15406	m3

## Sheet: TEA_figures
	Economic Data								Technical Data							Producer Price Index
	Key values (Cost)								Combustion plant							PPI Germany	(Destatis, 2025)
	Category	Amount	Unit	Year	Source				Category	Value	Unit	Source			Year	2000	2001	2002	2003	2004	2005	2006	2007	2008	2009	2010	2011	2012	2013	2014	2015	2016	2017	2018	2019	2020	2021	2022	2023	2024
	Miscanthus	147.233	€/t	2023	(Sieverdingbeck, 2024)				Miscanthus (OS) input	0.0647	Mg biomasse/h	(Fröling, 2025)			PPI	69.9	72	71.5	72.8	73.9	77.2	81.4	82.4	86.9	83.3	84.6	89	90.4	90.4	89.5	87.9	86.4	88.8	91.1	92.1	91.2	100	129.8	130.1	127.7
	Electricity	0.1699	€/kWh	2024	(Greifenberg, 2025)				Operation hours	8000	h/a	(Oreggioni et al., 2015; Pyreg, 2024a)
	Gas	0.0622	€/kWh	2024	(Bundesnetzagentur, 2024b)				Lifetime	20	years	(Oreggioni et al., 2015; Pyreg, 2024)
	LPG	1.05	€/l	2024	(myLPG, 2024)				max. Input	93	kg/h	(Fröling, 2025)
	Labor	40.5381	€/h	2024	(Destatis, 2024)				Total electrical energy use	0.0840301	kWh/Mg miscanthus	(Azzi et al., 2022)
	Big bag	10.87	€/bag	2024	(MyPellets, 2024)				District heat production (process heat consumption substracted)	2401280	kWh/a	(Fröling, 2025)
	Water (drink and pulpwater)	4.68	€/m3	2024	(VEA, 2024)				Investment Cost Combustion plant 300kW	140000	€	(Fröling, 2025)
	Property rent	6.42917	€/m2 per month	2024	(Statista & German Property Partners, 2024)				Service & Maintenance	17500	€/year	(Bolhàr-Nordenkampf et al., 2003)
	District heat	0.162	€/kWh	2023	(Green Innovation, 2024)				Ash treatment	4.09813	t / year	based on ecoinvent 3.10 process
	Ash treatment	99.6459	€/t	2009	(Eberhardinger et al., 2009)
	Key values (Finance)								Pyrolysis plant, PYREG PX1500
	Category	Amount	Unit	Year	Source				Category	Value	Unit	Source
	Discount rate r	0.05	n/a	n/a	(F. Cheng et al., 2021; Friedl et al., 2023)				Miscanthus (DS) input		t_biomass/a	(Pyreg, personal communication, 2024)
	Years of calculation	20	years	n/a	(Arfan et al., 2023; Azzi et al., 2022; Fawzy et al., 2022; Oreggioni et al., 2017; Pyreg, personal communication, 2024)				Biochar (Dry) output	607	t_biochar/a	(Pyreg, personal communication, 2024)
	Discount rate	0.05	n/a	n/a	(F. Cheng et al., 2021; Friedl et al., 2023)				Operation hours	8000	h/a	(Pyreg, personal communication, 2024)
	Left after tax	0.75	*100%	n/a	(Fawzy et al., 2022; Haeldermans et al., 2020)				Lifetime	20	years	(Oreggioni et al., 2015; Pyreg, 2024)
									Labor	1333	h/a	(Pyreg, personal communication, 2024)
	Key values (Revenue)								Property	196	m2	(Pyreg, personal communication, 2024)
	Category	Amount	Unit	Year	Source				Individual property	134	m2	(Ecokraft, personal communication, 2024)
	Biochar (FU)	500	€/t	2023	(BZL, 2023; Campion et al., 2023)				Carbon Removal amount for certification (according to CORC definition) C_sink - emission_suplly chain	0.309337	t_CO2/Mg miscanthus	own calculation
	Thermal heat	0.05	€/kWh	2024	(Green Innovation, 2024)				Total electrical energy use	36	kW	(Pyreg, personal communication, 2024)
	CRC	155.21	€/t CO2 removed	2024	(Höglund & Niparko, 2024)				LPG for start	9400	l/a	(Pyreg, personal communication, 2024)
	Biochar durability	0.75	n/a	n/a	(Azzi et al., 2024)				Electricity pretretament	242400	kWh/a	based on ecoinvent 3.10 process and Azzi et al. (2022)
									Water (total)	1	m3/biochar output	(Pyreg, personal communication, 2024)
	Agricultural application of biochar								District heat production	4944000	kWh/a	(Pyreg, personal communication, 2024)
	Category	Value	Unit	Year	Source				Cost PX1500	2000000	€	(Pyreg, personal communication, 2024)
	Biochar transport costs to application side (truck)	7.99075	€/t_biochar*20km	2021	(Sahoo et al., 2021), scaled to 20 km according to (Ruett et al., 2024)				Cost other Peripherie	290000	€	(Ecokraft, personal communication, 2024)
	Solid Manure Loading/ Spreading	6.75	€/t_biochar	2025	(KTBL, 2025)				Service & Maintenance	0.025	*100% of investment	(Pyreg, personal communication, 2024)
	Tillage, rotary cultivator	1.206	€/t_biochar	2025	(KTBL, 2025)				Insurance	0.005	*100% of investment	(Pyreg, personal communication, 2024)
									Ash	0.038	t/Mg miscanthus	based on ecoinvent 3.10
	References (sheets TEA_figures, TEA_BE, and TEA_BCR)
	Arfan, M., Eriksson, O., Wang, Z., Soam, S., 2023. Life cycle assessment and life cycle costing of hydrogen production from biowaste and biomass in Sweden. Energy Convers. Manag. 291, 117262. https://doi.org/10.1016/j.enconman.2023.117262
	Azzi, E.S., Karltun, E., Sundberg, C., 2022. Life cycle assessment of urban uses of biochar and case study in Uppsala, Sweden. Biochar 4, 18. https://doi.org/10.1007/s42773-022-00144-3
	Azzi, E.S., Li, H., Cederlund, H., Karltun, E., Sundberg, C., 2024. Modelling biochar long-term carbon storage in soil with harmonized analysis of decomposition data. Geoderma 441, 116761. https://doi.org/10.1016/j.geoderma.2023.116761
	BDEW, 2024. BDEW-Strompreisanalyse Dezember 2024 [WWW Document]. BDEW-Strompreisanalyse Dezember 2024. URL https://www.bdew.de/service/daten-und-grafiken/bdew-strompreisanalyse/ (accessed 3.5.25).
	Bolhàr-Nordenkampf, M., Rauch, R., Bosch, K., Aichernig, C., Hofbauer, H., 2003. Biomass CHP Plant Güssing – Using Gasification for Power Generation, in: Proceeding of the 2nd Regional Conference on Energy Technology Towards a Clean Environment. Presented at the 2nd Regional Conference on Energy Technology Towards a Clean Environment, 12-14 February 2003, Phuket, Thailand.
	Bundesnetzagentur, 2024. Einspeisevergütungen Strom aus Biomasse 2024 [WWW Document]. Ergebnisse der Ausschreibungsrunden für Biomasseanlagen 2024. URL https://www.bundesnetzagentur.de/DE/Fachthemen/ElektrizitaetundGas/Ausschreibungen/Biomasse/BeendeteAusschreibungen/start.html (accessed 3.27.25).
	Destatis, 2025. Producer Price Index Deutschland [WWW Document]. Erzeugerpreisindex gewerblicher Produkte: Deutschland, Jahre. URL https://www-genesis.destatis.de/datenbank/online/statistic/61241/table/61241-0001 (accessed 5.4.25).
	Destatis, 2024. Arbeitskosten in Deutschland im EU-Vergleich im Jahr 2022 [WWW Document]. URL https://www.destatis.de/DE/Presse/Pressemitteilungen/2023/04/PD23_164_624.html (accessed 3.3.24).
	Dominković, D.F., Wahlroos, M., Syri, S., Pedersen, A.S., 2018. Influence of different technologies on dynamic pricing in district heating systems: Comparative case studies. Energy 153, 136–148. https://doi.org/10.1016/j.energy.2018.04.028
	Eberhardinger, A., Schardt, M., Zormaier, F., Zimmer, B., 2009. Prozessanalyse und Ökobilanzierung der Bereitstellung von Waldhackgut zur thermischen Verwertung.
	Ecokraft, 2024. Ecokraft Pelletieranlage LP22.
	Fawzy, S., Osman, A.I., Mehta, N., Moran, D., Al-Muhtaseb, A.H., Rooney, D.W., 2022. Atmospheric carbon removal via industrial biochar systems: A techno-economic-environmental study. J. Clean. Prod. 371, 133660. https://doi.org/10.1016/j.jclepro.2022.133660
	Fröling, 2025. Data request Fröling Turbomat 320kW.
	Fröling, 2024. Technisches Datenblatt Turbomat TM 320-550.
	Green Innovations, 2024. Klimapositiv - Mit Pyrolyse Wärmenetze dekarbonisieren, CO2 binden & Landwirtschaft stärken (Webseminar 27.02.2024).
	Haeldermans, T., Campion, L., Kuppens, T., Vanreppelen, K., Cuypers, A., Schreurs, S., 2020. A comparative techno-economic assessment of biochar production from different residue streams using conventional and microwave pyrolysis. Bioresour. Technol. 318, 124083. https://doi.org/10.1016/j.biortech.2020.124083
	Höglund, R., Niparko, K., 2024. Carbon Removal Certificate Prices by Method 2024 [WWW Document]. CDR.fyi 2024 Year in Review. URL https://www.cdr.fyi/blog/2024-year-in-review (accessed 3.3.25).
	Homagain, K., Shahi, C., Luckai, N., Sharma, M., 2016. Life cycle cost and economic assessment of biochar-based bioenergy production and biochar land application in Northwestern Ontario, Canada. For. Ecosyst. 3, 21. https://doi.org/10.1186/s40663-016-0081-8
	KTBL, 2025. KTBL-Feldarbeitsrechner [WWW Document]. KTBL-Feldarbeitsrechner. URL https://daten.ktbl.de/feldarbeit/entry.html
	myLPG, 2024. LPG Prices Germany 2024 [WWW Document]. Chart of fuel prices in Germany. URL https://www.mylpg.eu/stations/germany/prices/ (accessed 3.5.25).
	MyPellets, 2024. BigBag Preise 2024 [WWW Document]. Big Bag wiederverwendbar 90X90X140 1500 kg. URL https://www.mypalletsonline.com/de/big-bag-bauabfaelle-und-kies/372-big-bag-wiederverwendbar-sf-6-1-90x90x140-1500kg.html (accessed 3.5.25).
	Oreggioni, G.D., Brandani, S., Luberti, M., Baykan, Y., Friedrich, D., Ahn, H., 2015. CO2 capture from syngas by an adsorption process at a biomass gasification CHP plant: Its comparison with amine-based CO2 capture. Int. J. Greenh. Gas Control 35, 71–81. https://doi.org/10.1016/j.ijggc.2015.01.008
	Oreggioni, G.D., Singh, B., Cherubini, F., Guest, G., Lausselet, C., Luberti, M., Ahn, H., Strømman, A.H., 2017. Environmental assessment of biomass gasification combined heat and power plants with absorptive and adsorptive carbon capture units in Norway. Int. J. Greenh. Gas Control 57, 162–172. https://doi.org/10.1016/j.ijggc.2016.11.025
	Pyreg, 2024. Performance Tables PX1500.
	Pyreg, 2024, personal communication with Pyreg: Meeting with Philipp Reichardt (Sales Manager, Pyreg) on 04.01.2024.
	Sahoo, K., Upadhyay, A., Runge, T., Bergman, R., Puettmann, M., Bilek, E., 2021. Life-cycle assessment and techno-economic analysis of biochar produced from forest residues using portable systems. Int. J. Life Cycle Assess. 26, 189–213. https://doi.org/10.1007/s11367-020-01830-9
	Sieverdingbeck, A., 2023. Kundenpreisliste für Miscanthus 2023. Sieverdingbeck Agrar.
	Statista, German Property Partners, 2024. Mietpreis für neu errichtete Industrie- und Logistikflächen [WWW Document]. URL https://de.statista.com/statistik/suche/?q=Mietpreis+für+Industrie-+und+Logistikfläche&Suche=&p=1 (accessed 3.6.24).
	VEA, 2024. VEA-Wasserpreisvergleich 2024.

## Sheet: TEA_BE
			Discount Factor		1	0.952381	0.907029	0.863838	0.822702	0.783526	0.746215	0.710681	0.676839	0.644609	0.613913	0.584679	0.556837	0.530321	0.505068	0.481017	0.458112	0.436297	0.415521	0.395734	0.376889
			Biomass input		517.6	492.952	469.478	447.122	425.831	405.553	386.241	367.849	350.332	333.65	317.762	302.63	288.219	274.494	261.423	248.974	237.119	225.827	215.073	204.832	195.078	6450.44
			Type of costs	Year																					Total (over 20 years)	Levelized Costs (over 20 years) €/Mg miscanthus
				0	1	2	3	4	5	6	7	8	9	10	11	12	13	14	15	16	17	18	19	20
	Costs [in €]	1.	Biomass price
		1.1	Miscanthus		-72578.8	-69122.7	-65831.1	-62696.3	-59710.8	-56867.4	-54159.4	-51580.4	-49124.2	-46784.9	-44557.1	-42435.3	-40414.6	-38490.1	-36657.2	-34911.6	-33249.2	-31665.9	-30158	-28721.9	-949717	-147.233
		2.	Gasification process
		2.1	CHP plant including delivery + build up	-140000	0	0	0	0	0	0	0	0	0	0	0	0	0	0	0	0	0	0	0	0	-140000	-21.7039	SUM process CAPEX	-140000
				linear depreciation																						0
		2.2	Electricity consumption		-7.03774	-6.70261	-6.38344	-6.07947	-5.78997	-5.51425	-5.25167	-5.00159	-4.76342	-4.53659	-4.32056	-4.11482	-3.91888	-3.73226	-3.55454	-3.38527	-3.22407	-3.07054	-2.92433	-2.78507	-92.0911	-0.0142767
		2.3	Service, Operation and Maintenance (incl. labor, water, insurance, property rent)		-16666.7	-15873	-15117.2	-14397.3	-13711.7	-13058.8	-12436.9	-11844.7	-11280.7	-10743.5	-10231.9	-9744.65	-9280.62	-8838.69	-8417.8	-8016.95	-7635.19	-7271.61	-6925.34	-6595.57	-218089	-33.8099
		2.4	Ash disposal		-388.916	-370.396	-352.758	-335.96	-319.962	-304.726	-290.215	-276.395	-263.234	-250.699	-238.761	-227.391	-216.563	-206.251	-196.429	-187.075	-178.167	-169.683	-161.603	-153.907	-5089.09	-0.788953
																											SUM process OPEX	-34.6131
	Revenue [in €]	3	Market revenues
		3.1	Generated district heat		114347	108902	103716	98776.9	94073.3	89593.6	85327.2	81264	77394.3	73708.9	70198.9	66856.1	63672.5	60640.5	57752.8	55002.7	52383.5	49889.1	47513.4	45250.9	1.49626e+06	231.963
			Costs	Total Costs	-1.31299e+06	€
				Levelized Costs	-203.55	€/Mg miscanthus
			Revenue	Total Revenue	1.49626e+06	€
				Levelized Revenue	231.963	€/Mg miscanthus
			Profit	Profit before tax	183276	€
				Levelized profit before tax	28.4129	€/Mg miscanthus
			Profit (after tax)	Total Profit after tax	137457	€
				Levelized profit after tax	21.3097	€/Mg miscanthus
			tax	Levelized tax	-7.10324	€/Mg miscanthus
The TEA calculation structure is based on Homagain et al. (2016)

## Sheet: TEA_BCR
			Discount Factor		1	0.952381	0.907029	0.863838	0.822702	0.783526	0.746215	0.710681	0.676839	0.644609	0.613913	0.584679	0.556837	0.530321	0.505068	0.481017	0.458112	0.436297	0.415521	0.395734	0.376889
			Miscanthus input		2525	2404.76	2290.25	2181.19	2077.32	1978.4	1884.19	1794.47	1709.02	1627.64	1550.13	1476.32	1406.01	1339.06	1275.3	1214.57	1156.73	1101.65	1049.19	999.228	951.646	31467.1
			Type of costs/revenues	Year																					Total (over 20 years)	Levelized Costs (over 20 years) €/Mg miscanthus
				0	1	2	3	4	5	6	7	8	9	10	11	12	13	14	15	16	17	18	19	20
	Costs [in €]	1.	Biomass																								SUM CAPEX	-72.7745
		1.1	Miscanthus		-354060	-337200	-321143	-305850	-291286	-277415	-264205	-251624	-239642	-228230	-217362	-207012	-197154	-187766	-178824	-170309	-162199	-154475	-147119	-140114	-4.63299e+06	-147.233
		2.	Pyrolysis process
		2.1	Pyrolysis plant	-2000000																					-2000000	-63.5585
				linear depreciation																						0
		2.2	Preteatment plant	-290000																					-290000	-9.21598
		2.2	Electricity consumption		-46601.1	-44382	-42268.6	-40255.8	-38338.9	-36513.2	-34774.5	-33118.6	-31541.5	-30039.5	-28609.1	-27246.7	-25949.3	-24713.6	-23536.7	-22415.9	-21348.5	-20331.9	-19363.7	-18441.7	-609791	-19.3787
		2.4	Electricity consumption pretreatment		-39222.6	-37354.9	-35576.1	-33882	-32268.6	-30732	-29268.5	-27874.8	-26547.4	-25283.3	-24079.3	-22932.7	-21840.6	-20800.6	-19810.1	-18866.8	-17968.3	-17112.7	-16297.8	-15521.7	-513241	-16.3104
		2.3	Labor		-51464.1	-49013.4	-46679.5	-44456.6	-42339.7	-40323.5	-38403.3	-36574.6	-34832.9	-33174.2	-31594.5	-30090	-28657.1	-27292.5	-25992.9	-24755.1	-23576.3	-22453.6	-21384.4	-20366.1	-673424	-21.4009
		2.4	Service and Maintenance		-47619	-45351.5	-43191.9	-41135.1	-39176.3	-37310.8	-35534.1	-33842	-32230.4	-30695.7	-29234	-27841.9	-26516.1	-25253.4	-24050.9	-22905.6	-21814.8	-20776	-19786.7	-18844.5	-623111	-19.802
		2.5	Insurance		-9523.81	-9070.29	-8638.38	-8227.02	-7835.26	-7462.15	-7106.81	-6768.39	-6446.09	-6139.13	-5846.79	-5568.37	-5303.21	-5050.68	-4810.17	-4581.12	-4362.97	-4155.21	-3957.34	-3768.89	-124622	-3.9604
		2.6	LPG supply		-9400	-8952.38	-8526.08	-8120.07	-7733.4	-7365.15	-7014.42	-6680.4	-6362.29	-6059.32	-5770.78	-5495.99	-5234.27	-4985.02	-4747.64	-4521.56	-4306.25	-4101.19	-3905.89	-3719.9	-123002	-3.90891
		2.7	Water		-2493.38	-2374.64	-2261.57	-2153.87	-2051.31	-1953.63	-1860.6	-1772	-1687.61	-1607.25	-1530.72	-1457.83	-1388.4	-1322.29	-1259.32	-1199.36	-1142.24	-1087.85	-1036.05	-986.713	-32626.6	-1.03685
		2.8	Property rent		-24247.2	-23092.5	-21992.9	-20945.6	-19948.2	-18998.3	-18093.6	-17232	-16411.4	-15629.9	-14885.6	-14176.8	-13501.7	-12858.8	-12246.5	-11663.3	-11107.9	-10579	-10075.2	-9595.42	-317282	-10.083
		2.9	Ash disposal		-9105.73	-8672.13	-8259.17	-7865.88	-7491.31	-7134.58	-6794.84	-6471.27	-6163.12	-5869.64	-5590.13	-5323.93	-5070.41	-4828.96	-4599.01	-4380.01	-4171.44	-3972.8	-3783.62	-3603.45	-119151	-3.78654
		3.	Packaging
		3.1	Big bag		-31419.5	-29923.3	-28498.4	-27141.3	-25848.9	-24618	-23445.7	-22329.2	-21265.9	-20253.3	-19288.8	-18370.3	-17495.5	-16662.4	-15869	-15113.3	-14393.6	-13708.2	-13055.4	-12433.8	-411134	-13.0655
		4.	Transport to application																								SUM OPEX	-112.733
		4.1	Transport		-4619.42	-4399.44	-4189.95	-3990.42	-3800.4	-3619.43	-3447.08	-3282.93	-3126.6	-2977.72	-2835.92	-2700.88	-2572.26	-2449.77	-2333.12	-2222.02	-2116.21	-2015.44	-1919.46	-1828.06	-60446.5	-1.92094
		5.	Application to soil
		5.1	Application to soil		-4599.33	-4380.31	-4171.72	-3973.07	-3783.88	-3603.69	-3432.09	-3268.65	-3113	-2964.77	-2823.59	-2689.13	-2561.08	-2439.12	-2322.97	-2212.35	-2107	-2006.67	-1911.11	-1820.11	-60183.7	-1.91259
	Revenue [in €]	6	Market revenues
		6.1	Biochar		289048	275283	262175	249690	237800	226476	215692	205421	195639	186323	177450	169000	160953	153288	145989	139037	132416	126111	120105	114386	3.78228e+06	120.198
		6.2	CDR-cert		115458	109960	104724	99736.9	94987.5	90464.3	86156.5	82053.8	78146.5	74425.2	70881.1	67505.8	64291.3	61229.8	58314.1	55537.2	52892.6	50373.9	47975.1	45690.6	1.5108e+06	48.0122
		6.3	Generated dirstrict heat		235429	224218	213541	203372	193688	184464	175680	167315	159347	151759	144533	137650	131095	124853	118907	113245	107853	102717	97825.4	93167.1	3.08066e+06	97.901
			Costs	Total Costs	-1.0591e+07	€
				Levelized Costs	-336.574	€/Mg miscanthus
			Revenue	Total Revenue	8.37374e+06	€
				Levelized Revenue	266.111	€/Mg miscanthus
			Profit	Profit before tax	-2.21726e+06	€
				Levelized profit before tax	-70.4629	€/Mg miscanthus
			Profit (after tax)	Total Profit after tax	-2.21726e+06	€
				Levelized profit after tax	-70.4629	€/Mg miscanthus
			tax	Levelized tax	0	€/Mg miscanthus
The TEA calculation structure is based on Homagain et al. (2016)
